# Supplementary material for: A ropy exopolysaccharide producing strainBifidobacterium longumsubsp.longumYS108R alleviates DSS-induced colitis by maintenance of the mucosal barrier and gut microbiota modulation
Source: Royal Society of Chemistry journal article supplement (doi:10.1039/c9fo00014c), 2019-01-01
Supplement: c9fo00014c1.pdf [file c9fo00014c1.pdf]

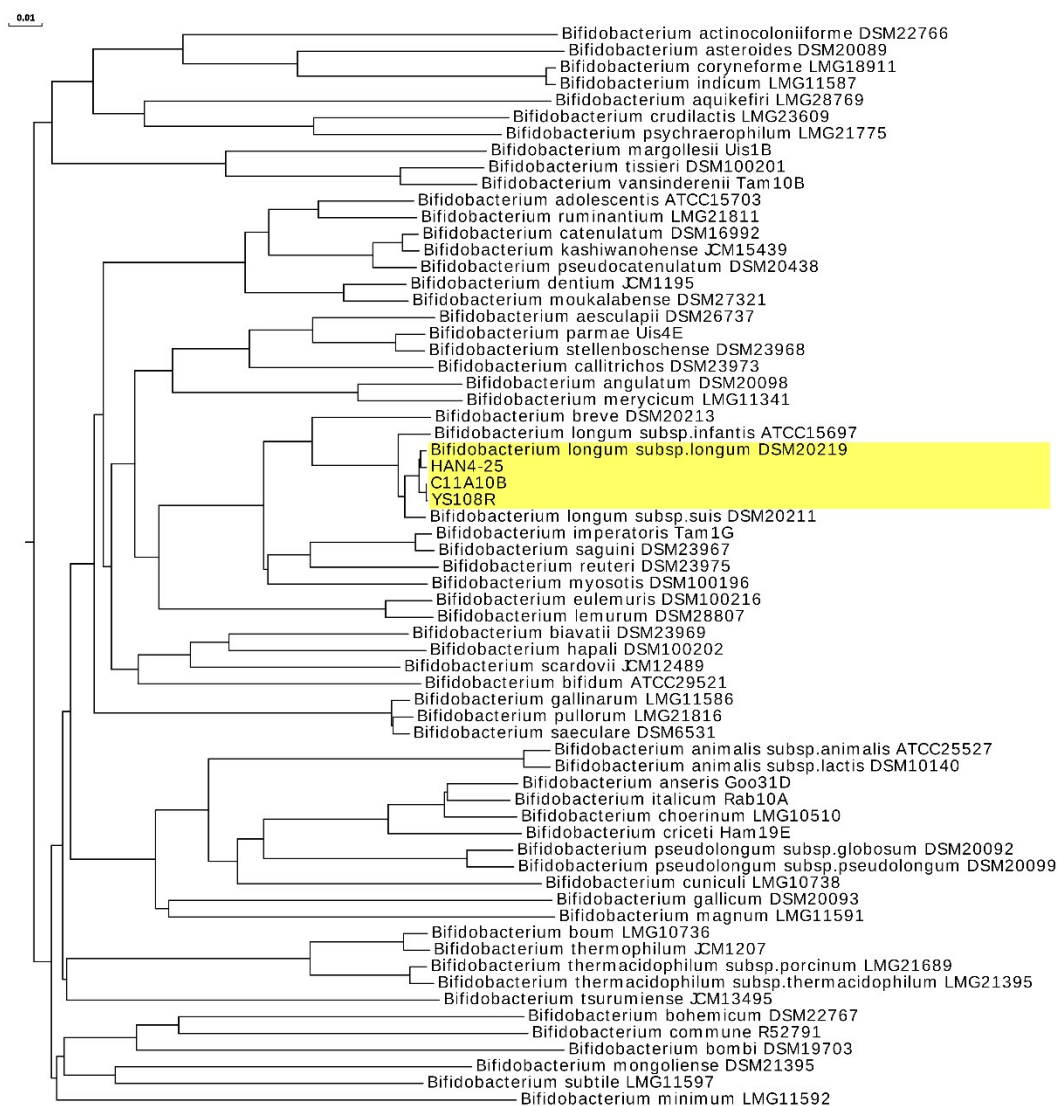

Fig. S1 Phylogenetic analysis based on genomic sequences

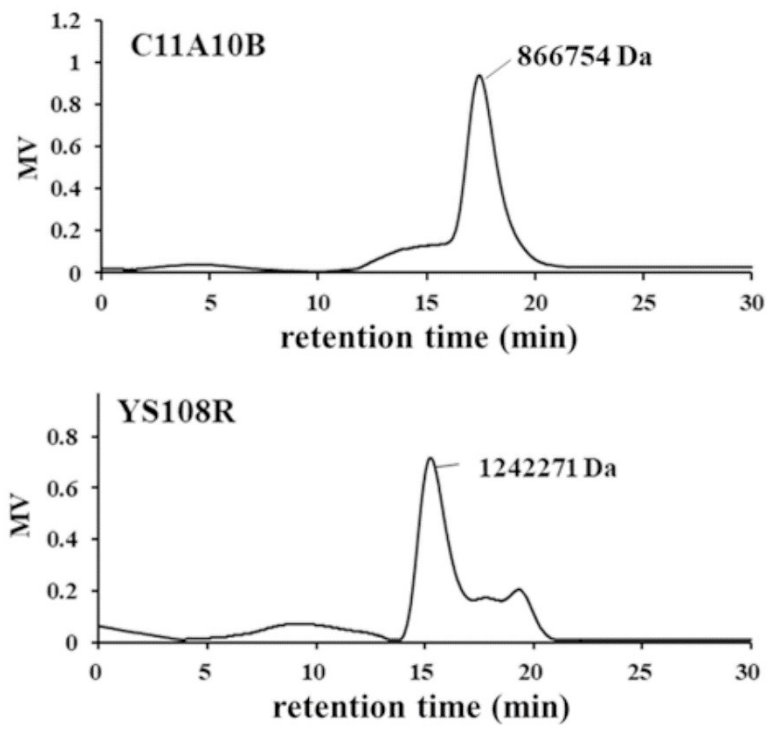

Fig. S2 Size exclusion chromatography analysis of EPS produced by *B. longum* C11A10B and YS108R
